# Supplementary material for: Structure and magnetism of new lanthanide 6-wheel compounds utilizing triethanolamine as a stabilizing ligand
Source: Royal Society of Chemistry journal article supplement (doi:10.1039/b921843b), 2009-12-23
Supplement: b921843b.pdf [file b921843b.pdf]

**Electronic Supplementary Information (2 pages) Dalton Trans B921843B**

**Structure and magnetism of new lanthanide 6-wheel compounds utilizing triethanolamine as a stabilizing ligand.**

Stuart. K. Langley,<sup>a</sup> Boujemaa Moubaraki,<sup>a</sup> Craig M. Forsyth,<sup>a</sup> Ian A. Gass<sup>a</sup> and Keith S. Murray<sup>a\*</sup>

Magnetic data:

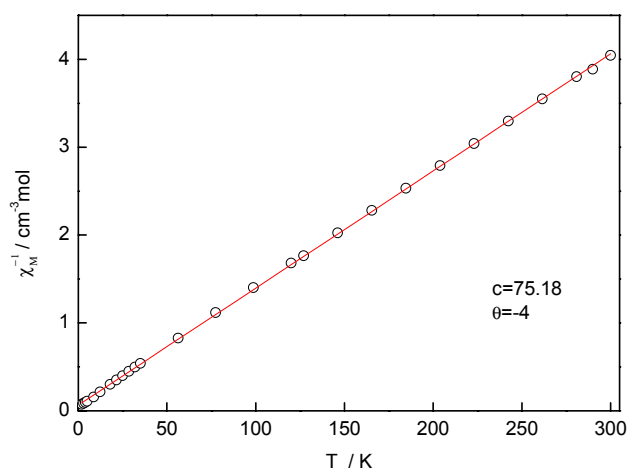

Fig. S1  $\chi_M^{-1}$  vs T for 1.8MeOH

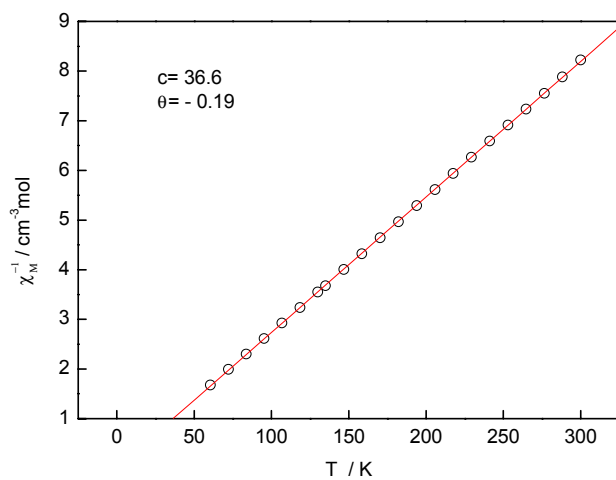

Fig. S2  $\chi_M^{-1}$  vs T for 2.8MeOH

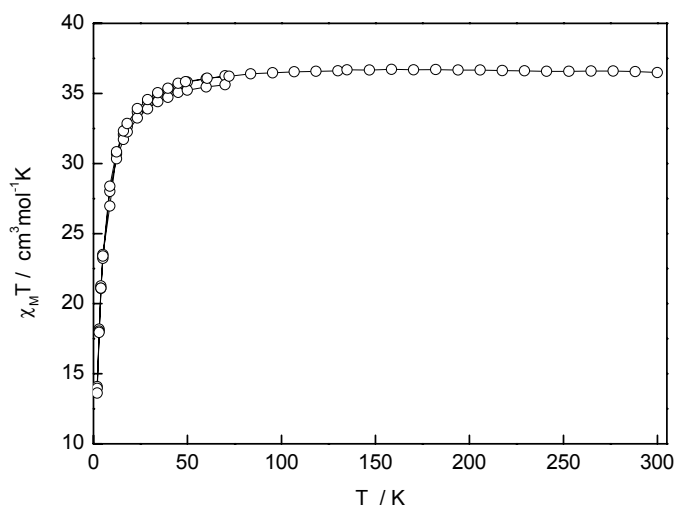

Fig. S3 Plot of  $\chi_M T$  vs. temperature for 2.8MeOH, in fields of 1 T and 0.1 T (70 – 2 K); the solid line just joins the points

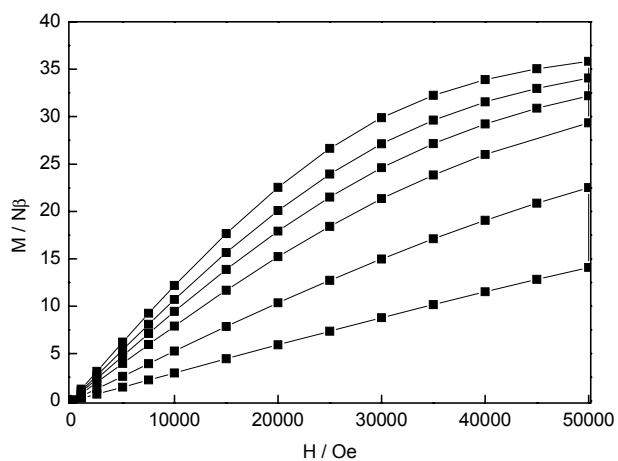

Fig. S4 Plots of isothermal magnetization,  $M$  (in  $N\beta$ ), vs. field (0 – 5 T) for 2.8MeOH at temperatures 2 (top), 3, 4, 5.5, 10, 20 K (bottom). Solid lines just join the points
